# Supplementary material
Source: publisher site journal article supplement (https://www.dovepress.com/article/272278)
Supplement: Supplementary file 1 [file get_supplementary_file.php]

**Association Between glutathione peroxidase-1 (GPx-1) Polymorphisms and Schizophrenia in the Chinese-Han Population**

Supplementary Material

**Figure S1.** **Agarose gel electrophoretograms for rs1800668.**

**
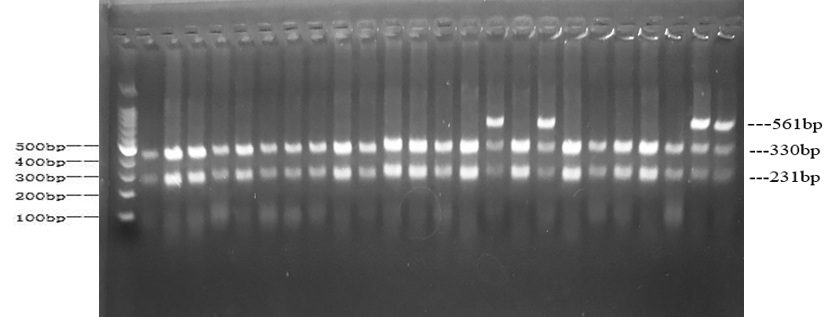
**

**Figure S2. Agarose gel electrophoretograms for rs1050450.**

**
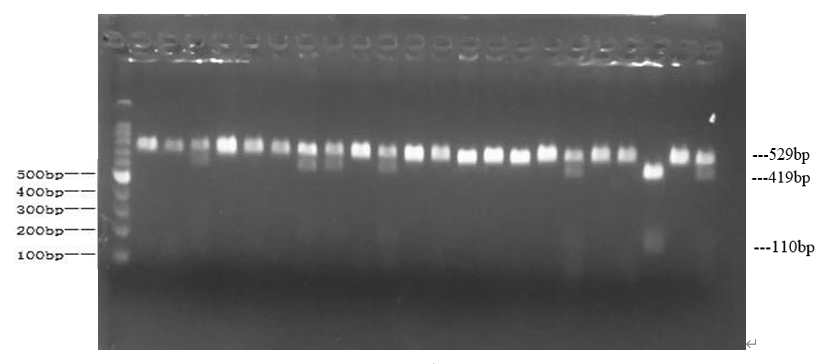
**

**Table S1.** Genotype and Allele Distributions of Rs1050450 in SCZ Group and Controls.

| SNP | Case, n (%) | Controls, n (%) | X2 | *p* |
| --- | --- | --- | --- | --- |
| CC | 295(81.9) | 365(85.7) |  |  |
| CT | 60(16.7) | 57(13.4) |  |  |
| TT | 5 (1.4) | 4(0.9) | 2.085 | 0.326 |
| Allele |  |  |  |  |
| C | 650(90.3) | 787(92.4) |  |  |
| T | 70(9.7) | 65(7.6) | 2.178 | 0.140 |
| Dominant Model |  |  |  |  |
| CC | 295(81.9) | 365(85.7) |  |  |
| CT+TT | 65(18.1) | 61(14.3) | 2.024 | 0.155 |
| Recessive Model |  |  |  |  |
| TT | 5 (1.4) | 4 (0.9) |  |  |
| CT+CC | 355(98.6) | 422(99.1) | 0.065 | 0.799 |

**Table S2.** Genotype and allele distributions of GPx-1 (rs1050450) in the SCZ group and controls separated by gender.

| SNP (Rs1050450) | Male Cases,  n (%) | Male Controls,  n (%) | X2 | *P* | Female Cases,  n (%) | Female Controls,  n (%) | X2 | *P* |
| --- | --- | --- | --- | --- | --- | --- | --- | --- |
| genotypes |  |  |  |  |  |  |  |  |
| CC | 170(86.7) | 181(89.2) |  |  | 125(76.2) | 184(82.5) |  |  |
| CT | 24(12.2) | 22(10.8) |  |  | 36(22.0) | 35(15.7) |  |  |
| TT | 2 (1.1) | 0(0.0) | 1.946 | 0.397 | 3 (1.8) | 4(1.8) | 2.555 | 0. 281 |
| Allele |  |  |  |  |  |  |  |  |
| C | 364(92.9) | 384(94.6) |  |  | 286(87.2) | 403(90.4) |  |  |
| T | 28(7.1) | 22(5.4) | 1.009 | 0.315 | 42(12.8) | 43(9.6) | 1.935 | 0.164 |
| Dominant Model |  |  |  |  |  |  |  |  |
| CC | 170(86.7) | 181(89.2) |  |  | 125(76.2) | 184(82.5) |  |  |
| CT+TT | 26(13.3) | 22(10.8) | 0.555 | 0.456 | 39(23.8) | 39(17.5) | 2.325 | 0.127 |
| Recessive Model |  |  |  |  |  |  |  |  |
| TT | 2 (1.0) | 0 (0.0) |  |  | 3 (1.8) | 4 (1.8) |  |  |
| CT+CC | 194(99.0) | 203(100.0) | - | 0.241 | 161(98.2) | 219(98.2) | 0.000 | 1.000 |
